# Supplementary material for: Diagnosis of acute cystitis in primary care: symptom-based versus urinalysis-based diagnosis
Source: PubMed Central journal article supplement (PMC9706387; doi:10.1017/s1463423622000627), 2022-11-17
Supplement: S1463423622000627sup001.pdf [file S1463423622000627sup001.pdf]

**Suppl. Fig. 1A - Dutch Acute Cystitis Symptom Score (ACSS) - Part A**  
**Vragenlijst blaasontsteking Eerste bezoek - Deel A**

Vragenlijst ingevuld (Datum):

(dd / mm / jiji)

Wilt u aankruisen of u in de afgelopen 24 uur last hebt gehad van een of meer van de volgende klachten en hoe erg de klachten waren

|                        |                                                                                                                  | Geen last<br>(0)                                 | Een beetje<br>(1)                        | Tamelijk erg<br>(2)                      | Heel erg<br>(3)                                |
|------------------------|------------------------------------------------------------------------------------------------------------------|--------------------------------------------------|------------------------------------------|------------------------------------------|------------------------------------------------|
| Gebruikelijke klachten | 1 Vaak plassen van kleine hoeveelheden urine (vaker naar de wc)                                                  | <input type="checkbox"/><br>4x of minder per dag | <input type="checkbox"/><br>5-6x per dag | <input type="checkbox"/><br>7-8x per dag | <input type="checkbox"/><br>9x of meer per dag |
|                        | 2 Plotselinge, sterke aandrang om te plassen                                                                     | <input type="checkbox"/>                         | <input type="checkbox"/>                 | <input type="checkbox"/>                 | <input type="checkbox"/>                       |
|                        | 3 Voelt u branderige pijn als u plast                                                                            | <input type="checkbox"/>                         | <input type="checkbox"/>                 | <input type="checkbox"/>                 | <input type="checkbox"/>                       |
|                        | 4 Gevoel dat u na het plassen weer zou moeten plassen (gevoel dat de blaas niet helemaal leeg is na het plassen) | <input type="checkbox"/>                         | <input type="checkbox"/>                 | <input type="checkbox"/>                 | <input type="checkbox"/>                       |
|                        | 5 Pijn in de onderbuik (lager dan uw navel), ook als u niet plast                                                | <input type="checkbox"/>                         | <input type="checkbox"/>                 | <input type="checkbox"/>                 | <input type="checkbox"/>                       |
|                        | 6 Bloed in de urine gezien? (geen menstruatiebloed)                                                              | <input type="checkbox"/>                         | <input type="checkbox"/>                 | <input type="checkbox"/>                 | <input type="checkbox"/>                       |

*totaalscore van gebruikelijke klachten:* \_\_\_\_\_

|                 |                                                                                                                                         |                                     |                                     |                                     |                                     |
|-----------------|-----------------------------------------------------------------------------------------------------------------------------------------|-------------------------------------|-------------------------------------|-------------------------------------|-------------------------------------|
| Andere klachten | 7 Pijn in een of beide flanken (pijn in een of beide zijkanten van onderrug)                                                            | <input type="checkbox"/>            | <input type="checkbox"/>            | <input type="checkbox"/>            | <input type="checkbox"/>            |
|                 | 8 Meer of andere vaginale afscheiding dan gewoonlijk (hoeveelheid, kleur en/of geur)                                                    | <input type="checkbox"/>            | <input type="checkbox"/>            | <input type="checkbox"/>            | <input type="checkbox"/>            |
|                 | 9 Afscheiding uit de plasopening zonder dat u plast                                                                                     | <input type="checkbox"/>            | <input type="checkbox"/>            | <input type="checkbox"/>            | <input type="checkbox"/>            |
|                 | 10 Gevoel dat u koorts of verhoging heeft?                                                                                              | <input type="checkbox"/>            | <input type="checkbox"/>            | <input type="checkbox"/>            | <input type="checkbox"/>            |
|                 | 10a Als u uw temperatuur gemeten heeft, wilt u dan aankruisen hoe hoog die was <input type="checkbox"/> Ja <input type="checkbox"/> Nee | $\leq 37,5\text{ }^{\circ}\text{C}$ | $37,6-37,9\text{ }^{\circ}\text{C}$ | $38,0-38,9\text{ }^{\circ}\text{C}$ | $\geq 39,0\text{ }^{\circ}\text{C}$ |

*totaalscore van andere klachten:* \_\_\_\_\_

11 Wilt u aankruisen hoeveel ongemak u de afgelopen 24 uur hebt gehad van uw klachten (kies het antwoord dat het dichtst bij komt)

|                     |                                                                                      |
|---------------------|--------------------------------------------------------------------------------------|
| Kwaliteit van leven | 0 Geen ongemak (helemaal geen klachten, ik voel me net zo als ik me gewoonlijk voel) |
|                     | 1 Een beetje ongemak (ik voel me een beetje slechter dan gewoonlijk)                 |
|                     | 2 Tamelijk veel ongemak (ik voel me behoorlijk slecht)                               |
|                     | 3 Heel veel ongemak (ik voel me vreselijk slecht)                                    |

12 Wilt u aankruisen hoe erg de klachten de afgelopen 24 uur uw dagelijkse activiteiten/werk hebben beïnvloed

|                     |                                                                                                               |
|---------------------|---------------------------------------------------------------------------------------------------------------|
| Kwaliteit van leven | 0 Geen invloed (heb zoals gewoonlijk mijn dagelijkse activiteiten/werk kunnen uitvoeren of had niets gepland) |
|                     | 1 Een beetje invloed (heb mijn dagelijkse activiteiten/werk met enig ongemak kunnen uitvoeren)                |
|                     | 2 Tamelijk veel invloed (heb mijn dagelijkse activiteiten/werk met moeite kunnen uitvoeren)                   |
|                     | 3 Heel veel invloed (bijna onmogelijk om mijn dagelijkse activiteiten/werk uit te voeren)                     |

13 Wilt u aankruisen hoe erg de klachten de afgelopen 24 uur uw sociale activiteiten (vrienden ontmoeten, uitgaan..) hebben beïnvloed

|                     |                                                                                         |
|---------------------|-----------------------------------------------------------------------------------------|
| Kwaliteit van leven | 0 Geen invloed (heb alles kunnen doen wat ik van plan was of was niets van plan)        |
|                     | 1 Een beetje invloed (heb minder kunnen doen dan ik van plan was)                       |
|                     | 2 Tamelijk veel invloed (heb veel minder kunnen doen dan ik van plan was)               |
|                     | 3 Heel veel invloed (door de klachten heb ik niets kunnen doen van wat ik van plan was) |

*totaalscore van kwaliteit van leven:* \_\_\_\_\_

14 Wilt u aankruisen of het volgende wel of niet op u van toepassing is

|                    |                                                                                               |                             |                              |
|--------------------|-----------------------------------------------------------------------------------------------|-----------------------------|------------------------------|
| Aanvullende vragen | Menstrueert u (heeft u maandelijkse bloedingen)?                                              | <input type="checkbox"/> Ja | <input type="checkbox"/> Nee |
|                    | Heeft u klachten zoals buikpijn in de week voor de menstruatie (Premenstruele klachten= PMS)? | <input type="checkbox"/> Ja | <input type="checkbox"/> Nee |
|                    | Heeft u last van overgangsklachten (zoals opvliegers)?                                        | <input type="checkbox"/> Ja | <input type="checkbox"/> Nee |
|                    | Bent u zwanger?                                                                               | <input type="checkbox"/> Ja | <input type="checkbox"/> Nee |
|                    | Heeft uw arts vastgesteld dat u diabetes mellitus heeft (suikerziekte)                        | <input type="checkbox"/> Ja | <input type="checkbox"/> Nee |

**Suppl. Fig. 1B - Dutch Acute Cystitis Symptom Score (ACSS) - Part B**  
**Vragenlijst blaasontsteking Vervolgbezoek - Deel B**

Vragenlijst ingevuld (Datum):

(dd / mm / jiji)

**Wilt u aankruisen of uw klachten (symptomen) veranderd zijn sinds het invullen van de eerste vragenlijst (kies het antwoord dat het beste weergeeft hoe u zich voelt)**

|                 |                                                                                        |
|-----------------|----------------------------------------------------------------------------------------|
| <b>Dynamiek</b> | 0 Ja, ik voel me zoals gewoonlijk, alle klachten zijn verdwenen                        |
|                 | 1 Ja, ik voel me veel beter, de meeste klachten zijn verdwenen,                        |
|                 | 2 Ja, ik voel me een beetje beter, een paar klachten zijn minder geworden of verdwenen |
|                 | 3 Nee, ik voel me slechter, mijn klachten zijn erger geworden                          |

**Wilt u aankruisen of u in de afgelopen 24 uur last hebt gehad van een of meer van de volgende klachten en hoe erg de klachten waren**

|                               | Geen last (0)                                                                                                    | Een beetje (1)                                   | Tamelijk erg (2)                         | Heel erg (3)                             |                                                |
|-------------------------------|------------------------------------------------------------------------------------------------------------------|--------------------------------------------------|------------------------------------------|------------------------------------------|------------------------------------------------|
| <b>Gebruikelijke klachten</b> | 1 Vaak plassen van kleine hoeveelheden urine (vaker naar de wc)                                                  | <input type="checkbox"/><br>4x of minder per dag | <input type="checkbox"/><br>5-6x per dag | <input type="checkbox"/><br>7-8x per dag | <input type="checkbox"/><br>9x of meer per dag |
|                               | 2 Plotselinge, sterke aandrang om te plassen                                                                     | <input type="checkbox"/>                         | <input type="checkbox"/>                 | <input type="checkbox"/>                 | <input type="checkbox"/>                       |
|                               | 3 Voelt u branderige pijn als u plast                                                                            | <input type="checkbox"/>                         | <input type="checkbox"/>                 | <input type="checkbox"/>                 | <input type="checkbox"/>                       |
|                               | 4 Gevoel dat u na het plassen weer zou moeten plassen (gevoel dat de blaas niet helemaal leeg is na het plassen) | <input type="checkbox"/>                         | <input type="checkbox"/>                 | <input type="checkbox"/>                 | <input type="checkbox"/>                       |
|                               | 5 Pijn in de onderbuik (lager dan uw navel), ook als u niet plast                                                | <input type="checkbox"/>                         | <input type="checkbox"/>                 | <input type="checkbox"/>                 | <input type="checkbox"/>                       |
|                               | 6 Bloed in de urine gezien? (geen menstratiebloed)                                                               | <input type="checkbox"/>                         | <input type="checkbox"/>                 | <input type="checkbox"/>                 | <input type="checkbox"/>                       |

*Totaalscore van gebruikelijke klachten:* \_\_\_\_\_

|                        |                                                                                      |                             |                              |                                                    |                                         |                                         |
|------------------------|--------------------------------------------------------------------------------------|-----------------------------|------------------------------|----------------------------------------------------|-----------------------------------------|-----------------------------------------|
| <b>Andere klachten</b> | 7 Pijn in een of beide flanken (pijn in een of beide zijanten van onderrug)          | <input type="checkbox"/>    | <input type="checkbox"/>     | <input type="checkbox"/>                           | <input type="checkbox"/>                |                                         |
|                        | 8 Meer of andere vaginale afscheiding dan gewoonlijk (hoeveelheid, kleur en/of geur) | <input type="checkbox"/>    | <input type="checkbox"/>     | <input type="checkbox"/>                           | <input type="checkbox"/>                |                                         |
|                        | 9 Afscheiding uit de plasopening zonder dat u plast                                  | <input type="checkbox"/>    | <input type="checkbox"/>     | <input type="checkbox"/>                           | <input type="checkbox"/>                |                                         |
|                        | 10 Gevoel dat u koorts of verhoging heeft?                                           | <input type="checkbox"/>    | <input type="checkbox"/>     | <input type="checkbox"/>                           | <input type="checkbox"/>                |                                         |
|                        | 10a Als u uw temperatuur gemeten heeft, wilt u dan aankruisen hoe hoog die was       | <input type="checkbox"/> Ja | <input type="checkbox"/> Nee | <input checked="" type="checkbox"/> $\leq 37,5$ °C | <input type="checkbox"/> $37,6-37,9$ °C | <input type="checkbox"/> $38,0-38,9$ °C |

*totaalscore van andere klachten:* \_\_\_\_\_

**11 Wilt u aankruisen hoeveel ongemak u de afgelopen 24 uur hebt gehad van uw klachten (kies het antwoord dat het dichtst bij komt)**

|                            |                                                                                      |
|----------------------------|--------------------------------------------------------------------------------------|
| <b>Kwaliteit van leven</b> | 0 Geen ongemak (helemaal geen klachten, ik voel me net zo als ik me gewoonlijk voel) |
|                            | 1 Een beetje ongemak (ik voel me een beetje slechter dan gewoonlijk)                 |
|                            | 2 Tamelijk veel ongemak (ik voel me behoorlijk slecht)                               |
|                            | 3 Heel veel ongemak (ik voel me vreselijk slecht)                                    |

**12 Wilt u aankruisen hoe erg de klachten de afgelopen 24 uur uw dagelijkse activiteiten/werk hebben beïnvloed**

|                            |                                                                                                               |
|----------------------------|---------------------------------------------------------------------------------------------------------------|
| <b>Kwaliteit van leven</b> | 0 Geen invloed (heb zoals gewoonlijk mijn dagelijkse activiteiten/werk kunnen uitvoeren of had niets gepland) |
|                            | 1 Een beetje invloed (heb mijn dagelijkse activiteiten/werk met enig ongemak kunnen uitvoeren)                |
|                            | 2 Tamelijk veel invloed (heb mijn dagelijkse activiteiten/werk met moeite kunnen uitvoeren)                   |
|                            | 3 Heel veel invloed (bijna onmogelijk om mijn dagelijkse activiteiten/werk uit te voeren)                     |

**13 Wilt u aankruisen hoe erg de klachten de afgelopen 24 uur uw sociale activiteiten (vrienden ontmoeten, uitgaan..) hebben beïnvloed**

|                            |                                                                                         |
|----------------------------|-----------------------------------------------------------------------------------------|
| <b>Kwaliteit van leven</b> | 0 Geen invloed (heb alles kunnen doen wat ik van plan was of was niets van plan)        |
|                            | 1 Een beetje invloed (heb minder kunnen doen dan ik van plan was)                       |
|                            | 2 Tamelijk veel invloed (heb veel minder kunnen doen dan ik van plan was)               |
|                            | 3 Heel veel invloed (door de klachten heb ik niets kunnen doen van wat ik van plan was) |

*totaalscore van kwaliteit van leven:* \_\_\_\_\_

**14 Wilt u aankruisen of het volgende wel of niet op u van toepassing is**

|                           |                                                                                               |    |     |
|---------------------------|-----------------------------------------------------------------------------------------------|----|-----|
| <b>Aanvullende vragen</b> | Menstrueert u (heeft u maandelijkse bloedingen)?                                              | Ja | Nee |
|                           | Heeft u klachten zoals buikpijn in de week voor de menstruatie (Premenstruele klachten= PMS)? | Ja | Nee |
|                           | Heeft u last van overgangsklachten (zoals opvliegers)?                                        | Ja | Nee |
|                           | Bent u zwanger?                                                                               | Ja | Nee |
|                           | Heeft uw arts vastgesteld dat u diabetes mellitus heeft (suikerziekte)                        | Ja | Nee |
